# Supplementary material for: Characterizing homozygosity across United States, New Zealand and Australian Jersey cow and bull populations
Source: PubMed Central journal article supplement (PMC4460752; doi:10.1186/s12864-015-1352-4), 2015-03-15

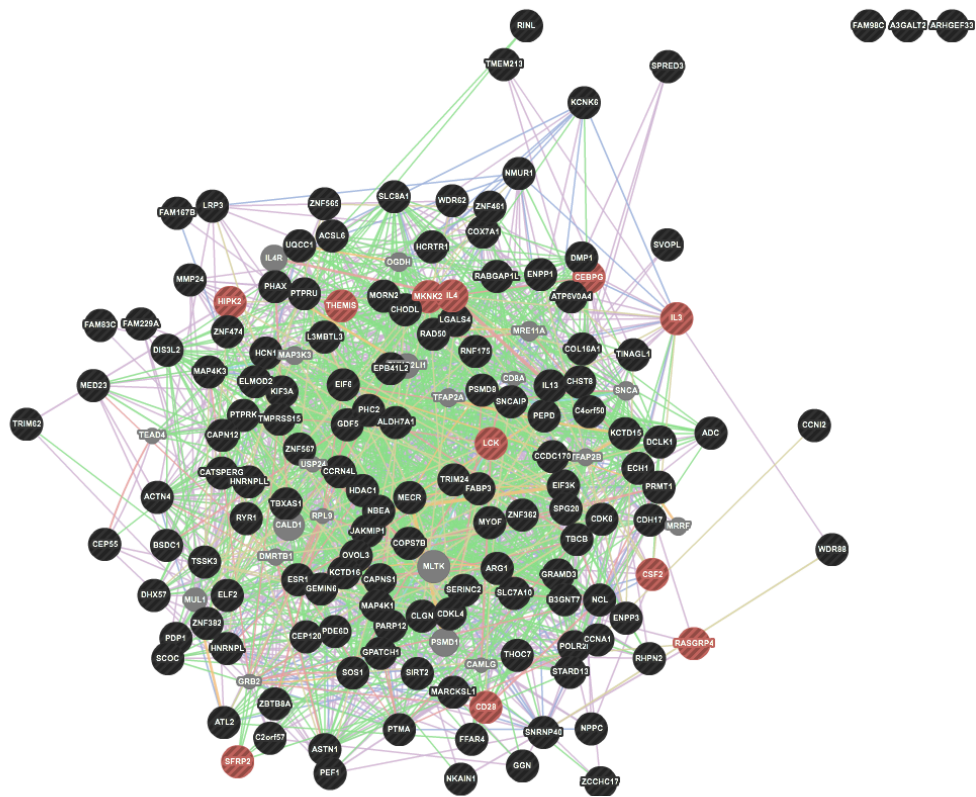

Supplement: 12864_2015_1352_MOESM3_ESM.pdf [file 12864_2015_1352_MOESM3_ESM.pdf]
